# Supplementary material
Source: PubMed Central journal article supplement (PMC6295276)

## **Supporting Information**

The on-fibrillation-pathway membrane content leakage and off-fibrillation-pathway lipid mixing induced by 40-residue  $\beta$ -amyloid peptides in biologically relevant model liposomes

Qinghui Cheng, Zhiwen Hu, Katelynne E. Doherty, Yuto J. Tobin-Miyaji, and Wei Qiang

Department of Chemistry, State University of New York at Binghamton, Binghamton, NY  
13902

## Tables

**Table S1** Percentage of A $\beta$ <sub>40</sub> binding to membranes with DMPC/DMPS/Cholesterol and DMPC/DMPS/Cholesterol/Sphingomyelin (Similar to **Fig. 1B** in main text, determined with analytical HPLC)

| DMPC/DMPS/Cholesterol |            | DMPC/DMPS/Cholesterol/Sphingomyelin |            |
|-----------------------|------------|-------------------------------------|------------|
| 1:30, w/o incubation  | 88.1 ± 4.8 | 1:30, w/o incubation                | 93.5 ± 2.1 |
| 1:30, w. incubation   | 53.6 ± 4.4 | 1:30, w. incubation                 | 58.2 ± 4.8 |
| 1:60, w/o incubation  | 78.5 ± 4.3 | 1:60, w/o incubation                | 80.3 ± 4.4 |
| 1:60, w. incubation   | 40.7 ± 5.2 | 1:60, w. incubation                 | 43.6 ± 3.9 |
| 1:90, w/o incubation  | 62.1 ± 5.2 | 1:90, w/o incubation                | 73.0 ± 3.2 |
| 1:90, w. incubation   | 24.6 ± 4.7 | 1:90, w. incubation                 | 28.8 ± 3.5 |
| 1:120, w/o incubation | 55.4 ± 3.3 | 1:120, w/o incubation               | 58.9 ± 5.5 |
| 1:120, w. incubation  | 19.0 ± 2.6 | 1:120, w. incubation                | 22.3 ± 4.0 |

## Figures

**Figure S1** TEM images of ssNMR samples (A) before and (B) after the performance of experiments.

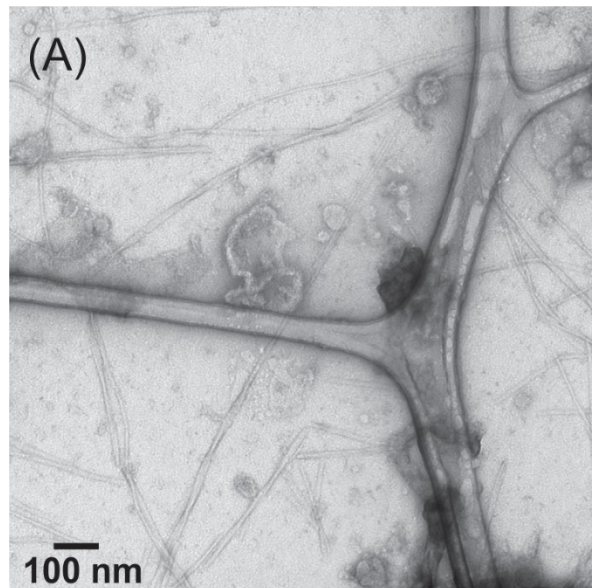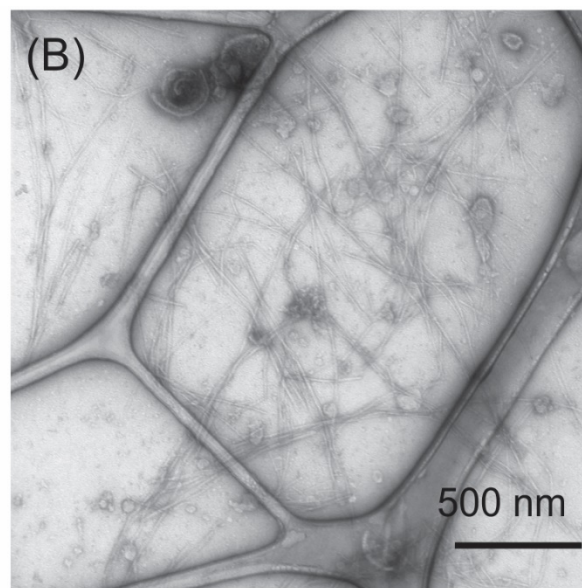

**Figure S2** 2D and 1D spectra for A $\beta$ <sub>40</sub> fibrils labeled at L17, N27 and I32 (highlighted in spectra) in POPC (panel A) and DMPC/PS/cholesterol/sphingomyelin/ganglioside GM1 (panel B) membranes. Panel C showed representative 1D slices along two chemical shifts to show the structural similarity (indicated by the dashed lines) between the two fibrils (top: spectrum in panel A; bottom: spectrum in panel B) at high-resolution level.

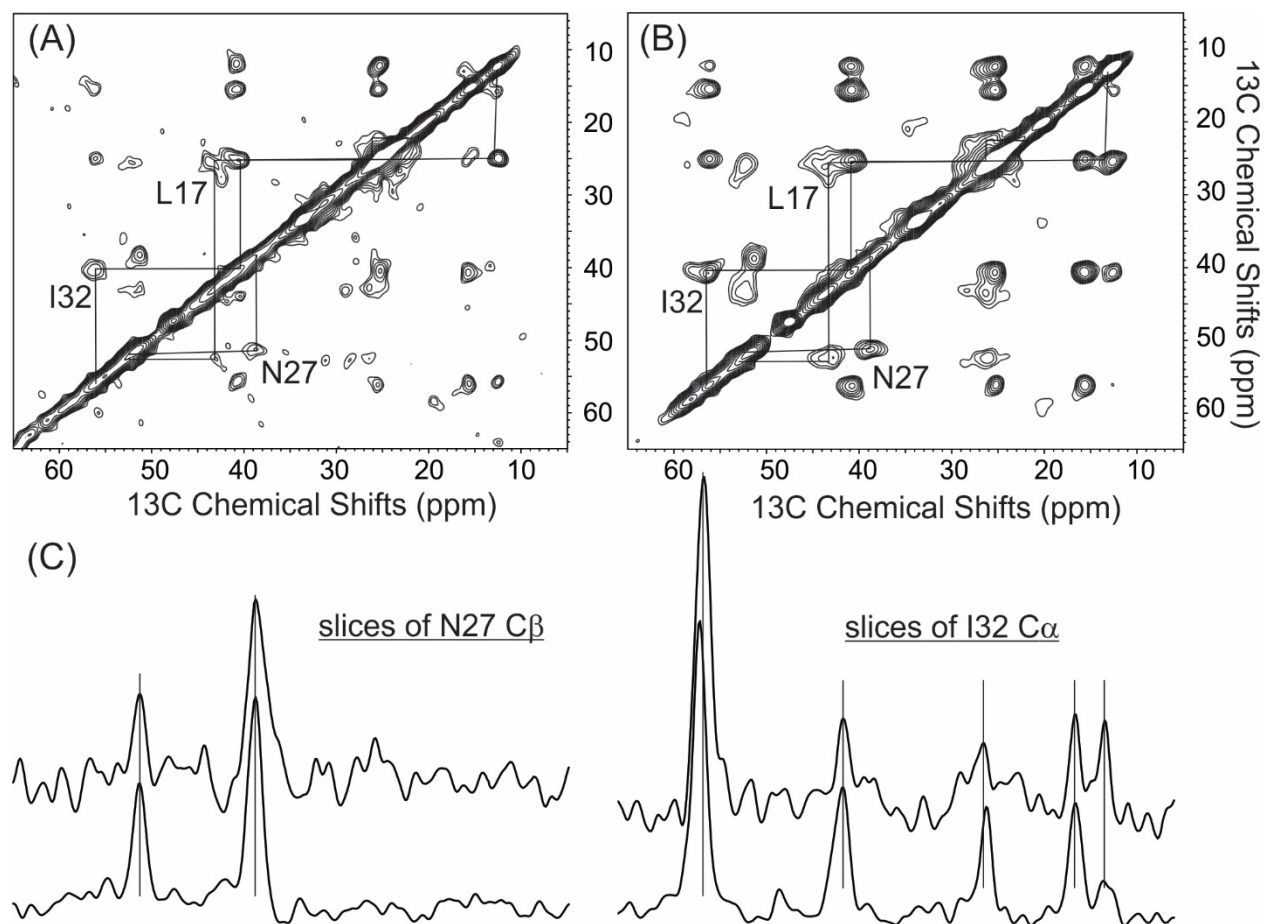

Supplement: NIHMS997595-supplement-S_I_.pdf [file NIHMS997595-supplement-S_I_.pdf]
